# Supplementary material for: Synthesis and characterization of vanadium-doped Mo(O,S)2 oxysulfide for efficient photocatalytic degradation of organic dyes
Source: Royal Society of Chemistry journal article supplement (doi:10.1039/d0nj02565h), 2020-01-01
Supplement: d0nj02565h1.pdf [file d0nj02565h1.pdf]

## Supplementary Information

### **Synthesis and characterization of vanadium-doped Mo(O,S)<sub>2</sub> oxysulfide for efficient photocatalytic degradation of organic dyes**

**Sleshi Fentie Tadesse<sup>a</sup>, Dong-Hau Kuo<sup>\*a</sup>, Worku Lakew Kebede<sup>a</sup>, Lalisa Wakira Duresa<sup>a</sup>**

<sup>a</sup>Department of Materials Science and Engineering, National Taiwan University of Science and Technology, No. 43, Keelung Rd., Sec. 4, Da'an Dist., Taipei 10607, Taiwan

\*Corresponding author, [dhkuo@mail.ntust.edu.tw](mailto:dhkuo@mail.ntust.edu.tw), fax +011-886-2-27303291

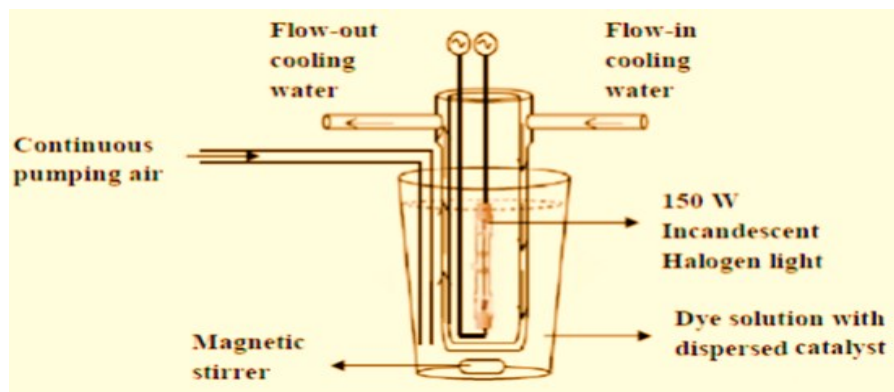

**Fig. S1.** Visible light experimental setup for degradation of methylene blue (MB) dye in aqueous solutions using the synthesis photocatalyst.

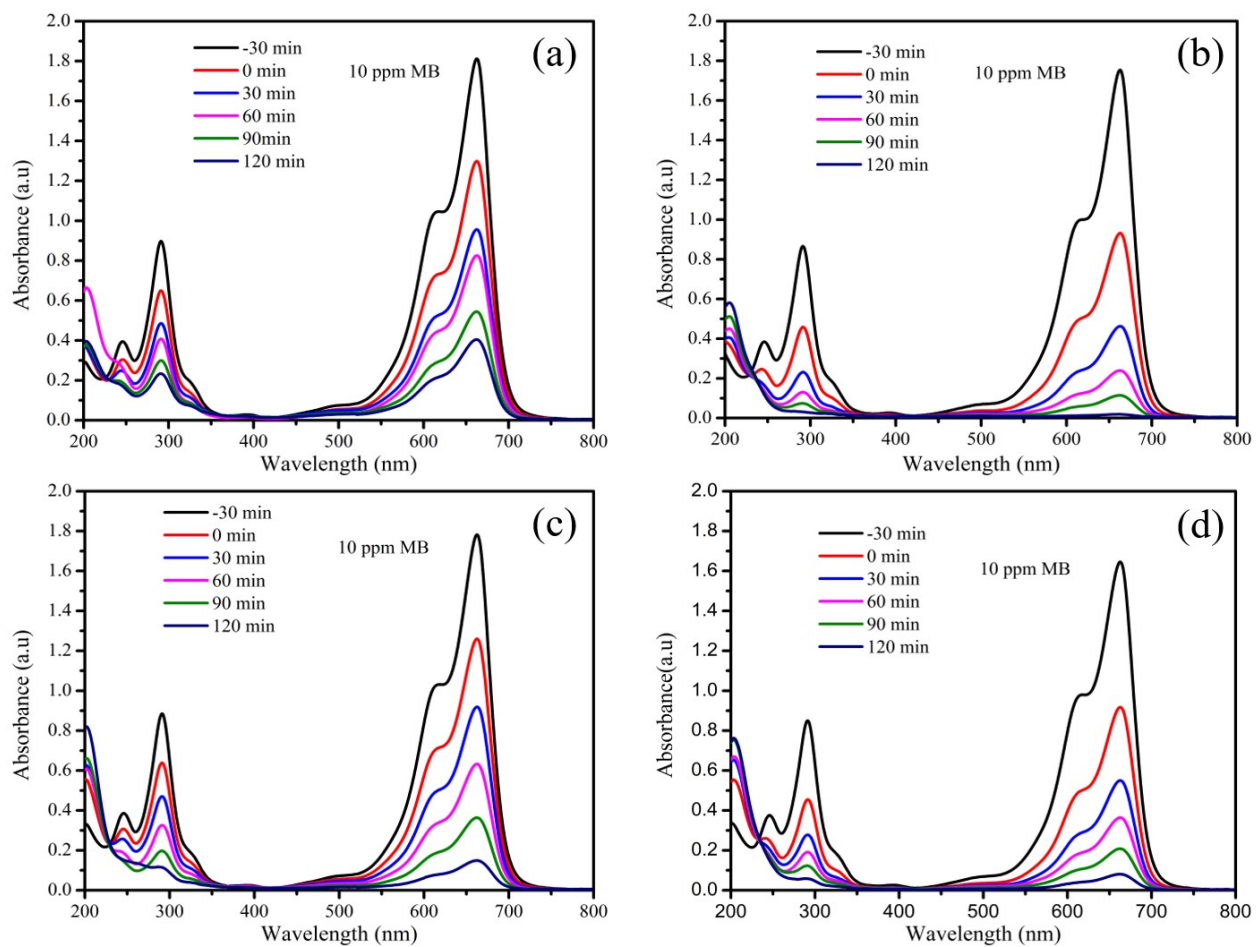

**Fig. S2.** UV-Visible absorbance profile for MB degradation using (a) V-Mo(O,S)<sub>2</sub>-0, (b) V-Mo(O,S)<sub>2</sub>-10, (c) V-Mo(O,S)<sub>2</sub>-5, and (d) V-Mo(O,S)<sub>2</sub>-20.

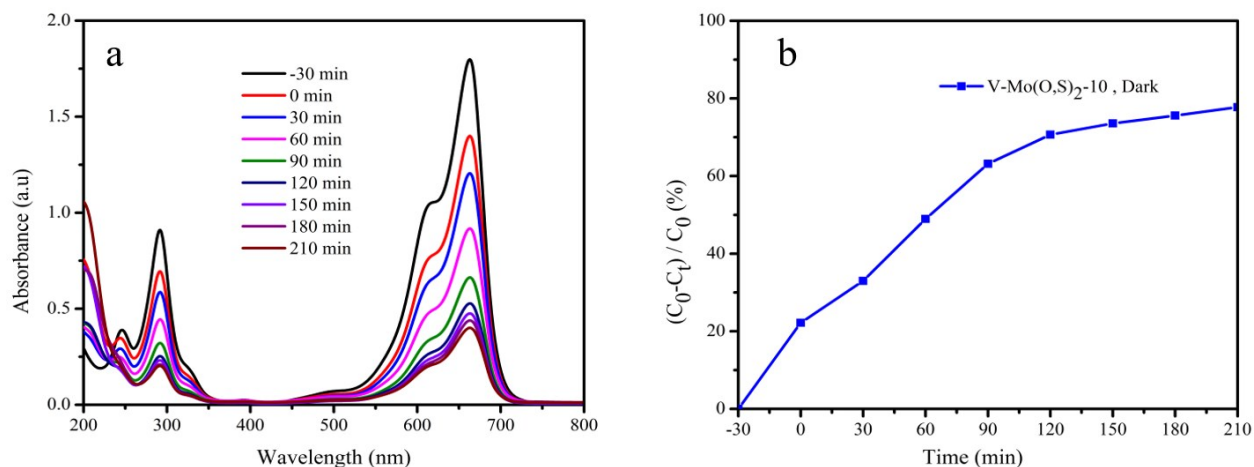

**Fig. S3.** (a) UV-Visible absorbance spectra for MB degradation using V-Mo(O,S)<sub>2</sub>-10 under dark condition . (b) Degradation efficiency of MB over V-Mo(O,S)<sub>2</sub>-10 under dark condition.

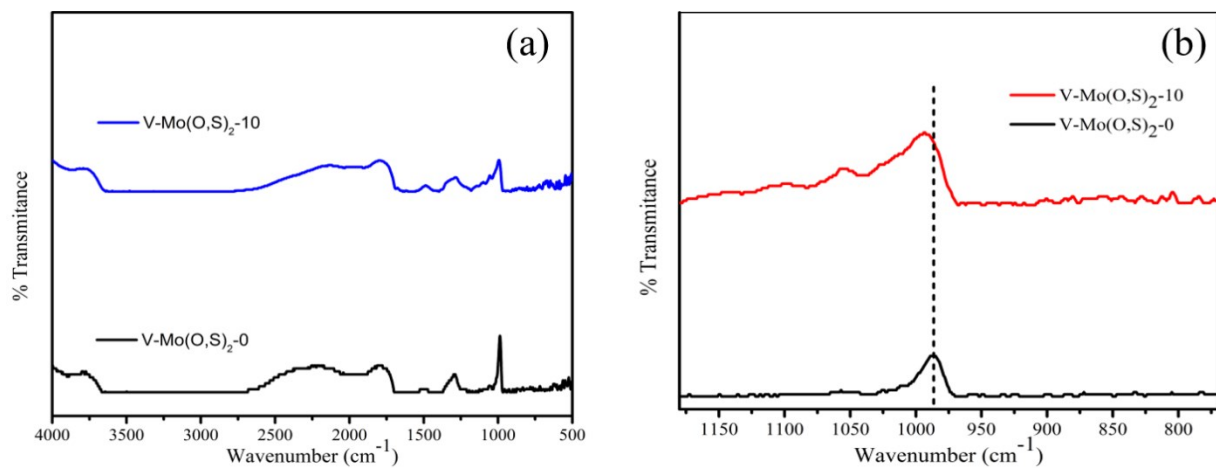

**Fig. S4.** (a) FT-IR spectra of bare Mo(O,S)<sub>2</sub> and V-doped Mo(O,S)<sub>2</sub>. (b) Scaled view illustrating the shift of the vibrational frequency at 987 cm<sup>-1</sup> for V-doped Mo(O,S)<sub>2</sub> in comparison with bare Mo(O,S)<sub>2</sub>.

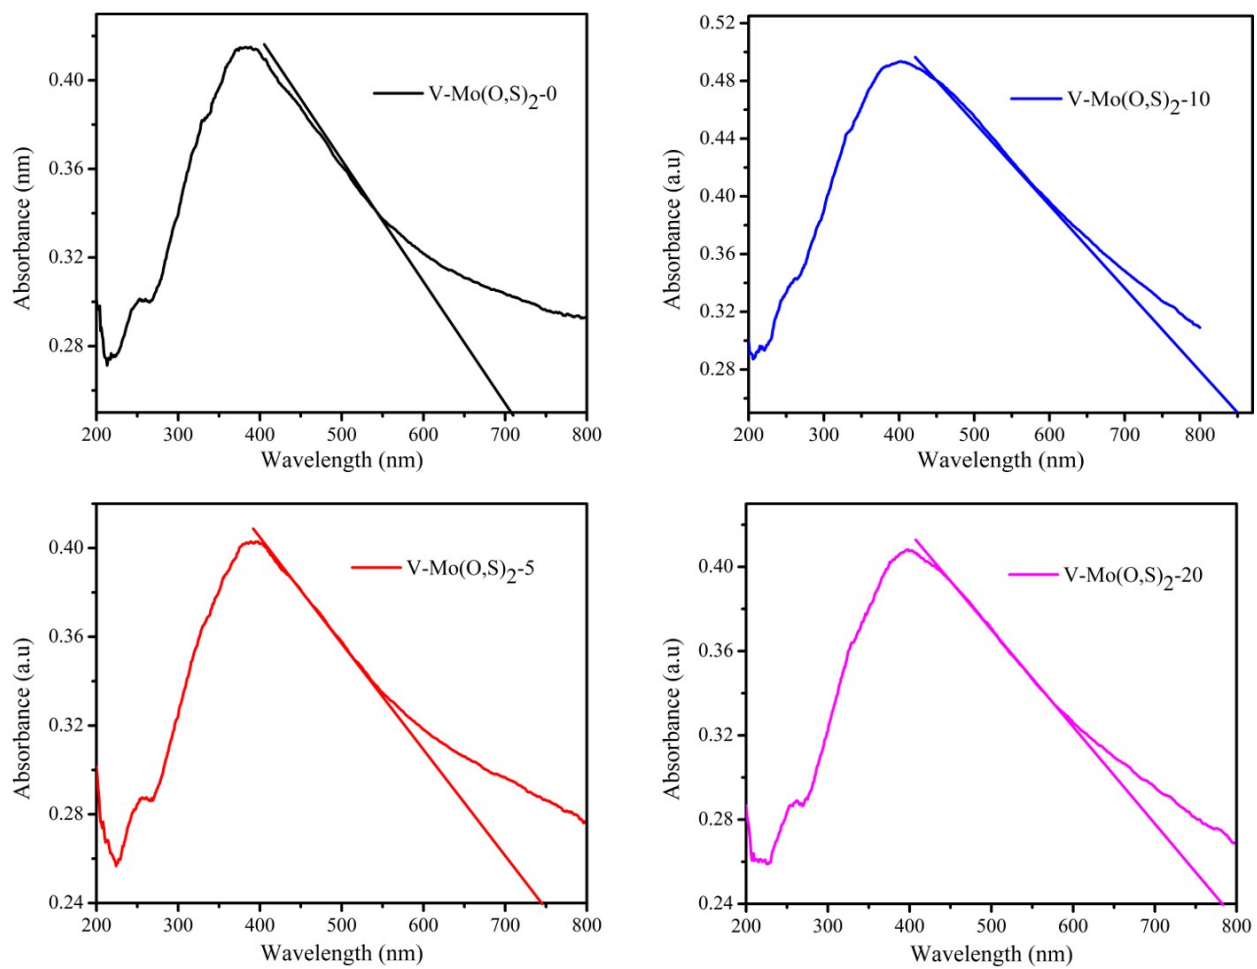

**Fig. S5.** UV-Vis diffuse reflectance spectra of V-Mo(O,S)<sub>2-0</sub>, V-Mo(O,S)<sub>2-5</sub>, V-Mo(O,S)<sub>2-10</sub>, and V-Mo(O,S)<sub>2-20</sub>, in view of the absorption edges.

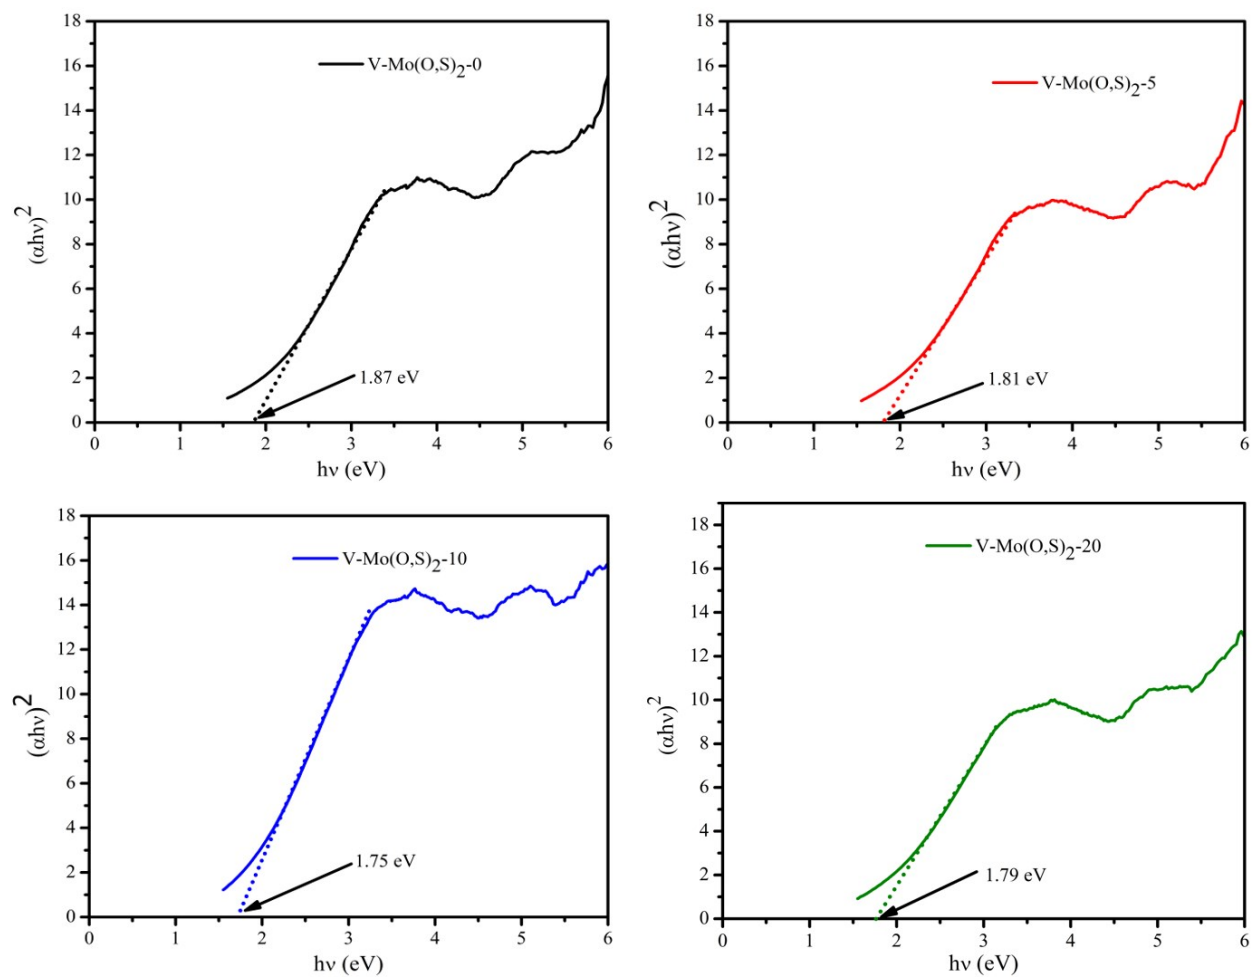

**Fig. S6.** Tauc plot for bandgap energy values of V-Mo(O,S)<sub>2</sub>-0, V-Mo(O,S)<sub>2</sub>-5, V-Mo(O,S)<sub>2</sub>-10, and V-Mo(O,S)<sub>2</sub>-20.

**Table S1.** Kinetics parameters of V-Mo(O,S)<sub>2</sub> oxysulfides for photocatalytic MB degradation

| Conditions                       | Rate constant, k (min <sup>-1</sup> ) | Pearson's r | R <sup>2</sup> | Intercept |
|----------------------------------|---------------------------------------|-------------|----------------|-----------|
| V-Mo(O,S) <sub>2</sub> -0        | 0.0098                                | 0.9984      | 0.9959         | 0.3111    |
| V-Mo(O,S) <sub>2</sub> -5        | 0.0155                                | 0.9891      | 0.9729         | 0.3427    |
| V-Mo(O,S) <sub>2</sub> -10       | 0.0279                                | 0.9939      | 0.98472        | 0.6754    |
| V-Mo(O,S) <sub>2</sub> -20       | 0.0194                                | 0.9964      | 0.9910         | 0.5290    |
| V-Mo(O,S) <sub>2</sub> -10, dark | 0.0074                                | 0.9837      | 0.9595         | 0.3125    |
| Blank                            | 0.0033                                | 0.9850      | 0.963          | 0.0520    |

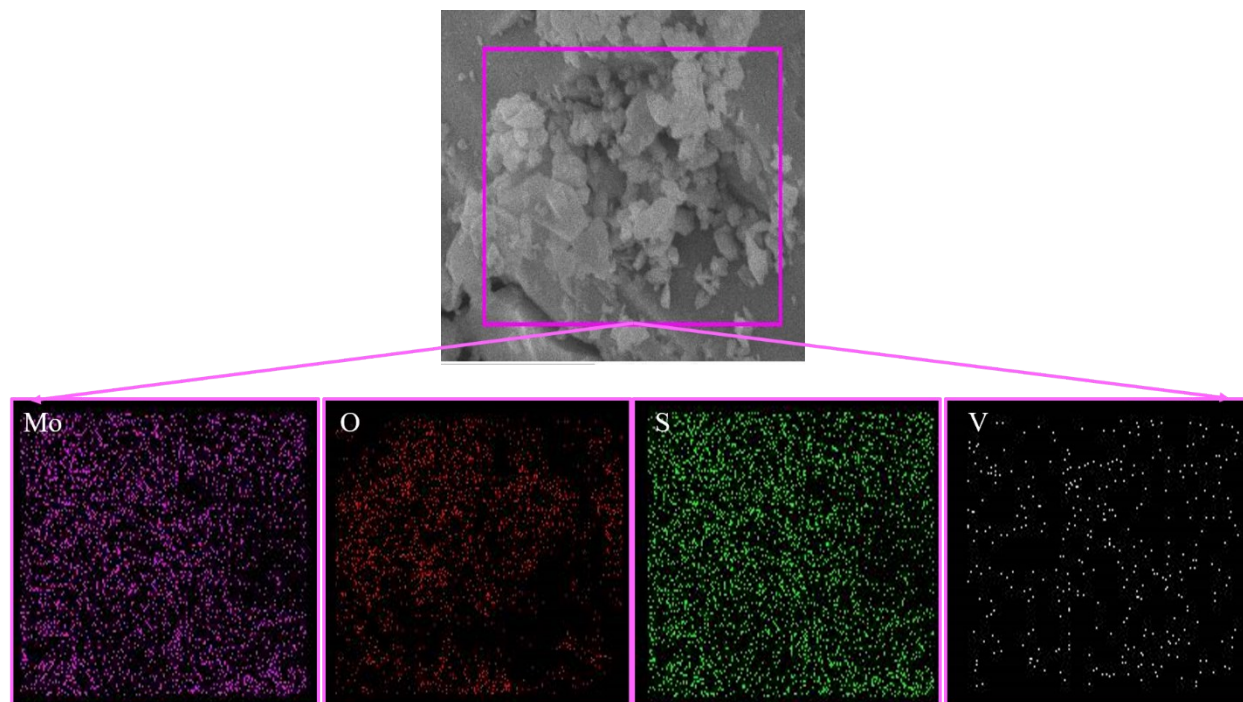

**Fig. S7.** EDS elemental mapping of Mo, O, S and V.

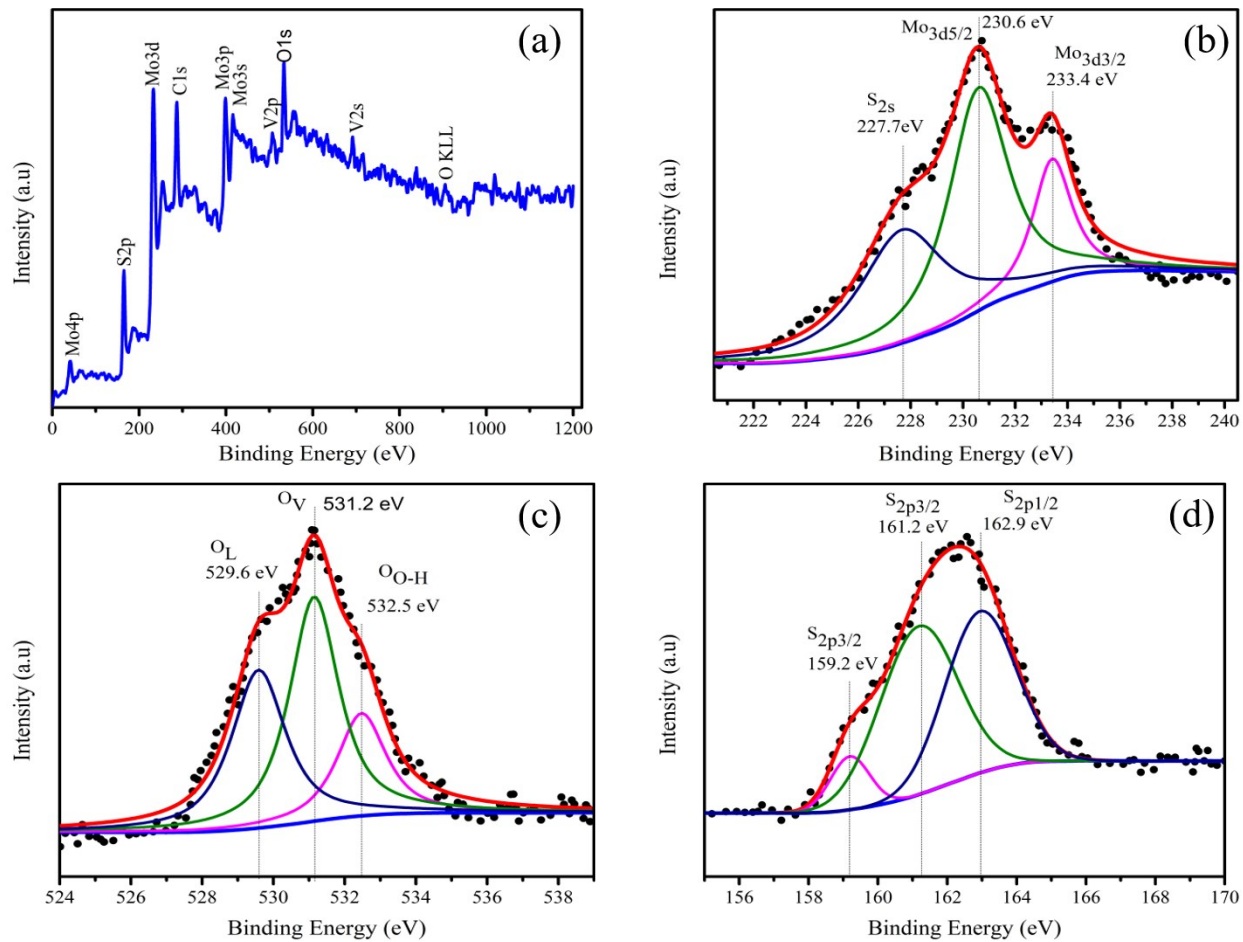

**Fig. S8.** (a) XPS full survey spectra for V-Mo(O,S)<sub>2</sub>-10. High resolution spectra of (b) Mo3d, (c) O1s, and (d) S2p for pristine Mo(O,S)<sub>2</sub>.



**Table S2 .** Binding energy of the deconvoluted XPS peaks of Mo3d, S2p, O1s, and V2p for V-Mo(O,S)<sub>2</sub>-10 and V-Mo(O,S)<sub>2</sub>-0

| Photocatalyst              | Binding Energy (eV) |                     |                     |                    |                    |                    |                 |                |                |                    |                    |                    |                   |
|----------------------------|---------------------|---------------------|---------------------|--------------------|--------------------|--------------------|-----------------|----------------|----------------|--------------------|--------------------|--------------------|-------------------|
|                            | Mo <sub>3d</sub>    |                     |                     | S <sub>2p</sub>    |                    |                    | O <sub>1s</sub> |                |                | V <sub>2p</sub>    |                    |                    |                   |
|                            | 2s                  | Mo <sub>3d5/2</sub> | Mo <sub>3d3/2</sub> | S <sub>2p3/2</sub> | S <sub>2p3/2</sub> | S <sub>2p1/2</sub> | O <sub>ad</sub> | O <sub>L</sub> | O <sub>V</sub> | V <sub>2p3/2</sub> | V <sub>2p3/2</sub> | V <sub>2p1/2</sub> | V <sub>2p12</sub> |
| V-Mo(O,S) <sub>2</sub> -10 | 226.2               | 229.5               | 232.5               | 159.1              | 161.2              | 162.8              | 527.8           | 529.5          | 531.3          | 512.8              | 516.9              | 519.7              | 524.2             |
| V-Mo(O,S) <sub>2</sub> -0  | 227.7               | 230.6               | 233.4               | 159.2              | 161.2              | 162.9              | 532.5           | 529.6          | 531.2          | -                  | -                  | -                  |                   |

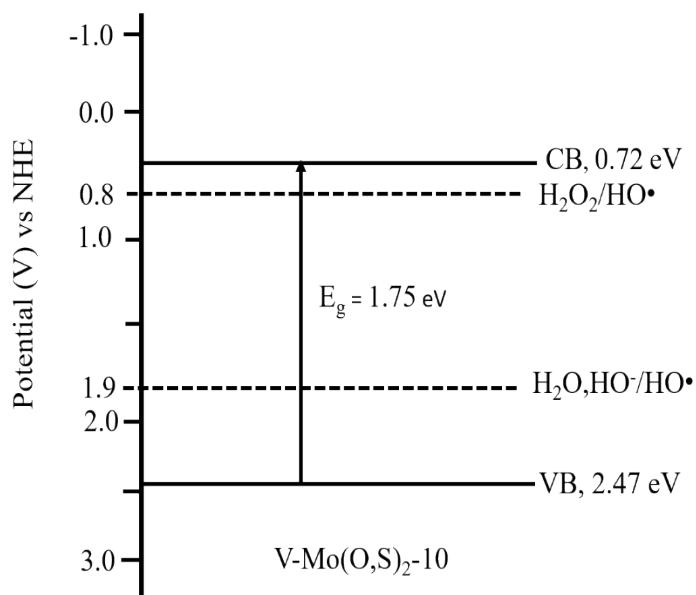

**Fig. S9.** Band edge potentials of V-Mo(O,S)<sub>2</sub>-10 nanoplates for photocatalytic MB degradation.
